# Supplementary material for: Synthesis of hexagonal tungsten bronze nanoparticles at a significantly lower temperature and in a shorter time
Source: Royal Society of Chemistry journal article supplement (doi:10.1039/d5nr01600b), 2025-01-01
Supplement: d5nr01600b1.pdf [file d5nr01600b1.pdf]

## Supplementary Information

### Synthesis of hexagonal tungsten bronze with significantly lower temperature and shorter time

Fandong Kong<sup>a</sup> and Ruixing Li<sup>\*a</sup>

School of Materials Science and Engineering, Beihang University, Beijing 100191, China

<sup>†</sup>\*Corresponding author: [1499149583@qq.com](mailto:1499149583@qq.com)

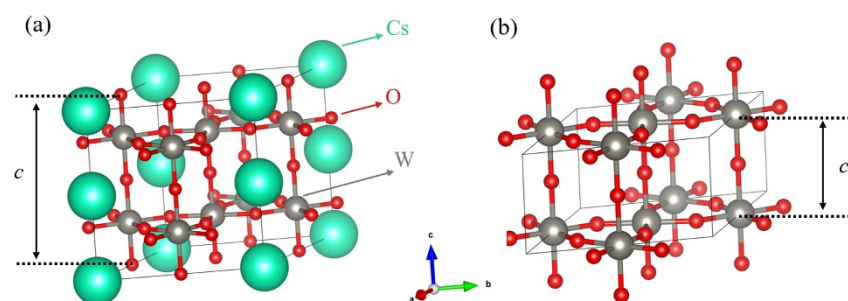

Figure S1 Crystal structures of (a)  $h\text{-M}_x\text{WO}_3$  (i.e.,  $h\text{-Cs}_{0.33}\text{WO}_3$ ) with  $P6_3/mcm$  symmetry and (b)  $h\text{-WO}_3$  or  $[\text{WO}_6]$  framework of  $h\text{-Na}_x\text{WO}_3$  with  $P6/mmm$  symmetry derived from VESTA.
